# Supplementary material
Source: Frontiers journal article supplement (https://www.frontiersin.org/articles/504465)
Supplement: Image_1.pdf [file Image_1.pdf]

## Flow Chart Treatment CSF Otorrhoea

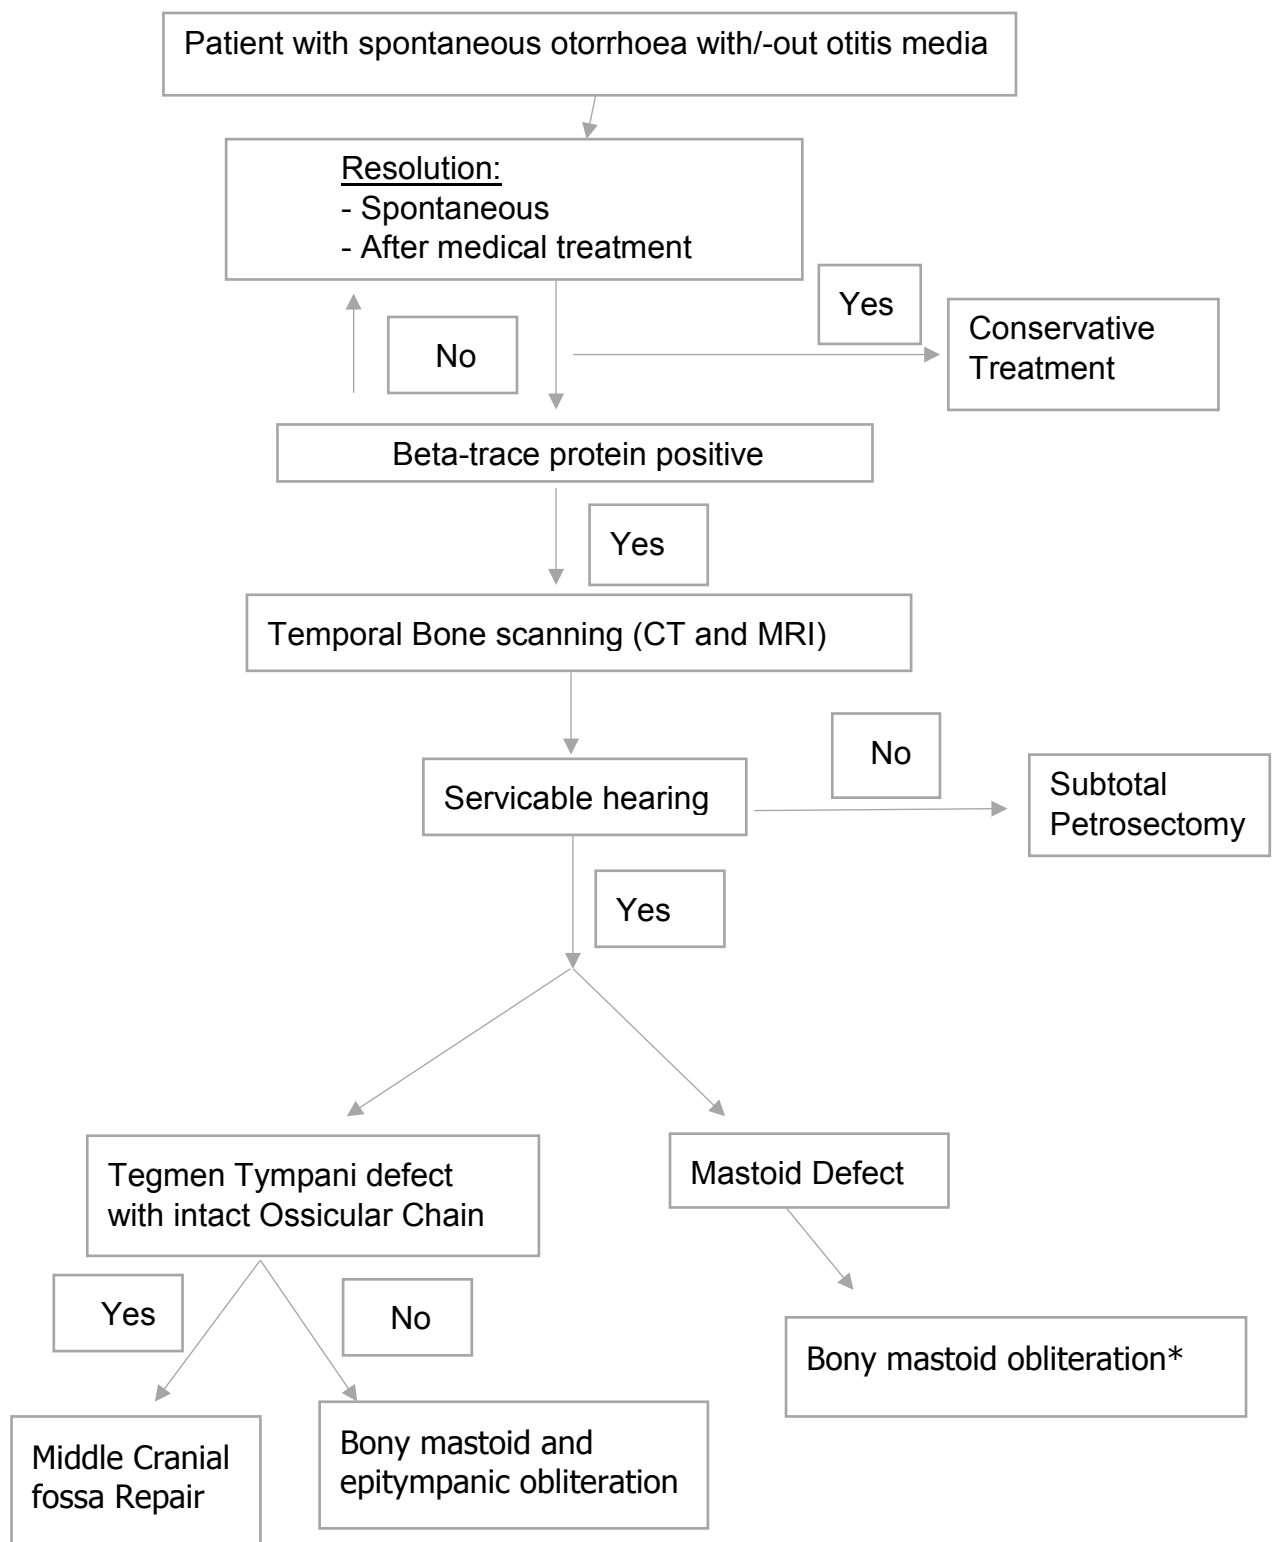

\* In cases where space (>0.8mm) between intact ossicular chain and tegmen tympani defect: then only underlay reconstruction tegmen defect with bony mastoid obliteration, without ossicular chain sacrifice
